# Supplementary material for: Bacterial community diversity on in-shell walnut surfaces from six representative provinces in China
Source: PubMed Central journal article supplement (PMC5577159; doi:10.1038/s41598-017-10138-y), 2017-08-30
Supplement: 41598_2017_10138_MOESM1_ESM.pdf [file 41598_2017_10138_MOESM1_ESM.pdf]

**Bacterial community diversity on in-shell walnut surfaces from six representative  
provinces in China**

Lihui Zhang<sup>1</sup>, Shaojin Wang<sup>1,2\*</sup>

<sup>1</sup>College of Mechanical and Electronic Engineering, Northwest A&F University, Yangling, Shaanxi 712100, China.<sup>2</sup> Department of Biological Systems Engineering, Washington State University, Pullman, WA 99164-6120, USA. Correspondence and requests for materials should be addressed to S. -J. W. (email: [shaojinwang@nwsuaf.edu.cn](mailto:shaojinwang@nwsuaf.edu.cn))

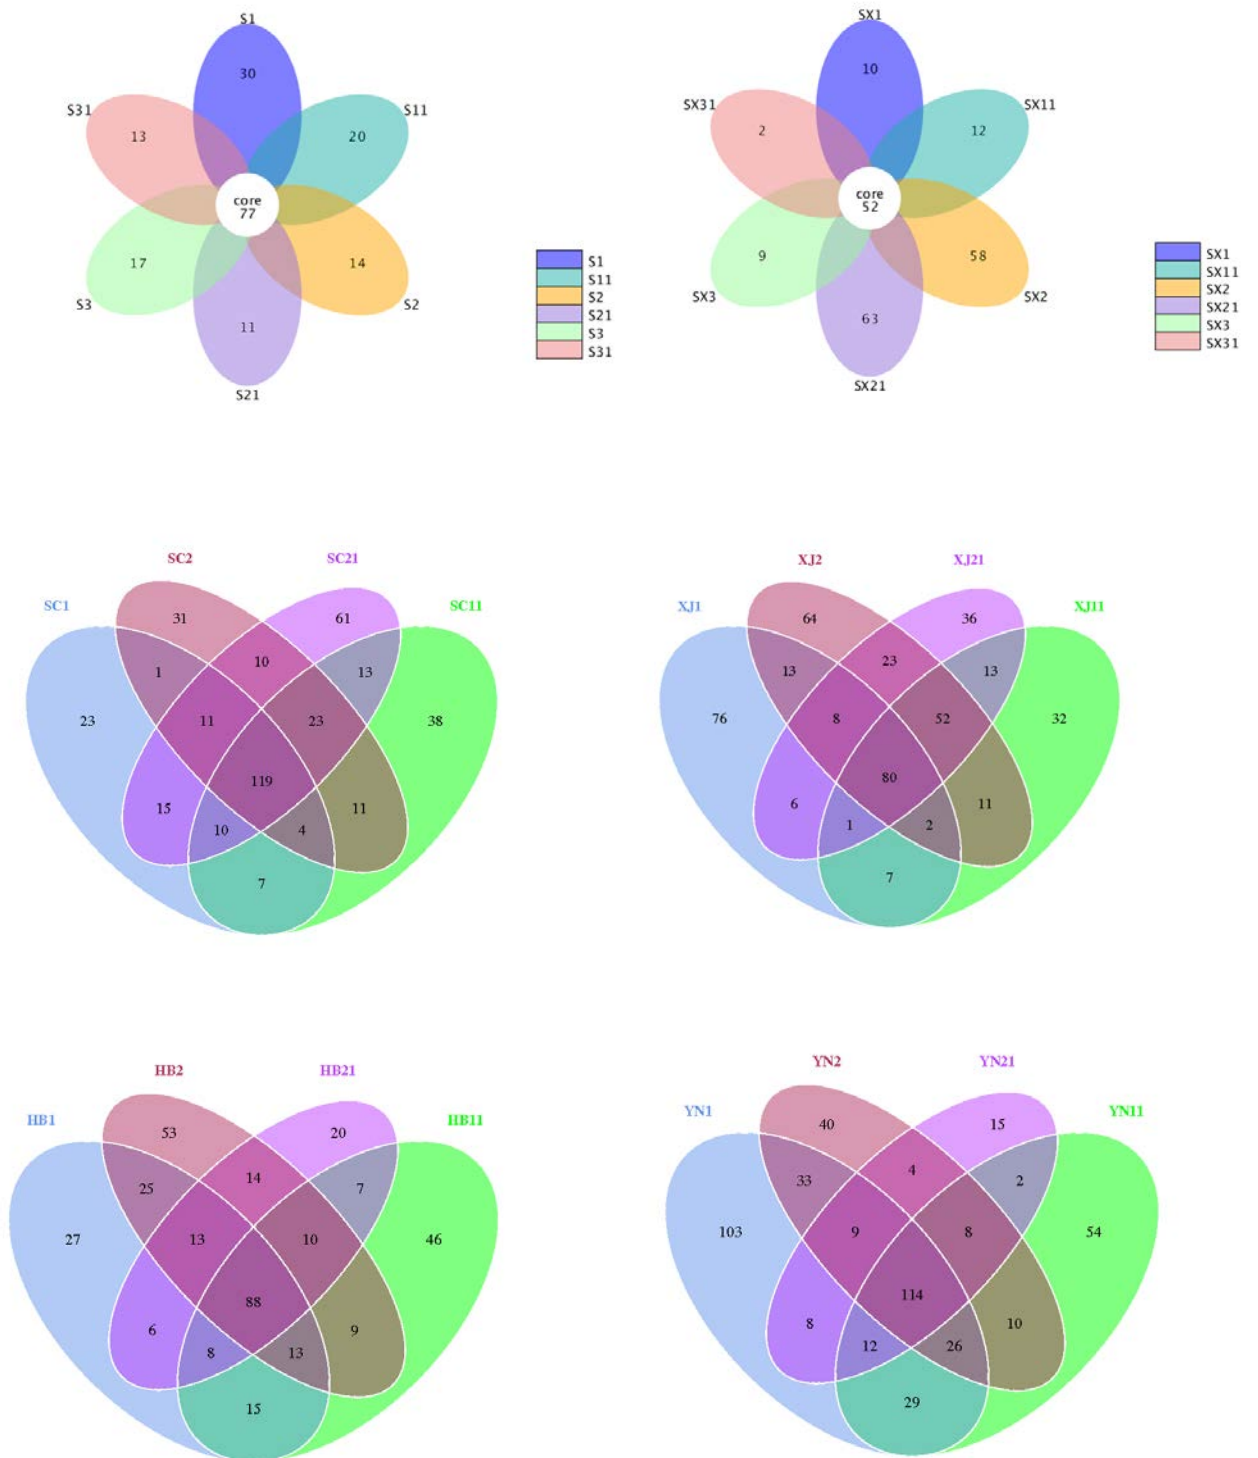

Fig. S1. Venn and flower plots of the samples within the same province.
